# Supplementary material
Source: PubMed Central journal article supplement (PMC7155939)
Supplement: NIHMS1569599-supplement-2.pdf [file NIHMS1569599-supplement-2.pdf]

## SUPPLEMENTAL INFORMATION

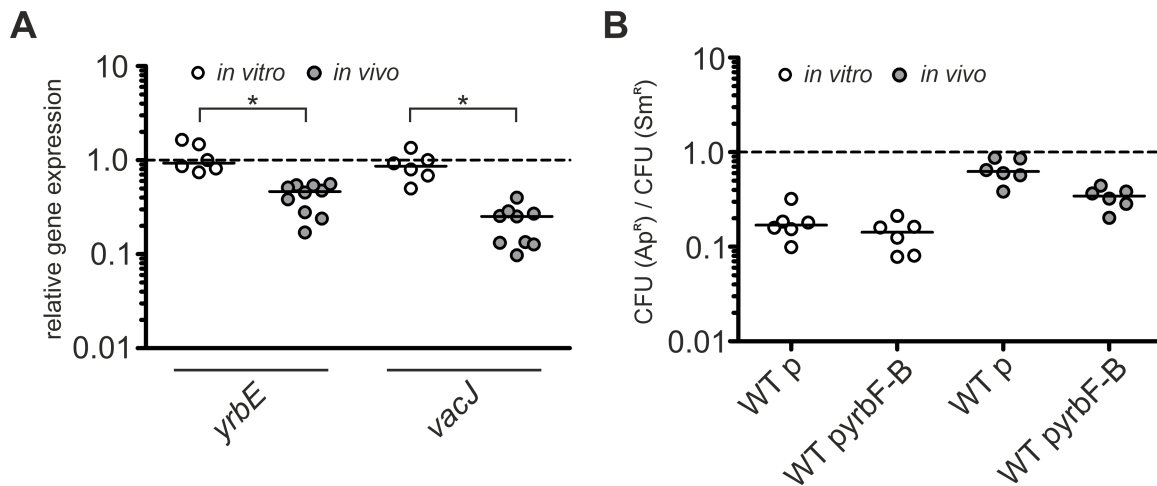

**Figure S1. *In vivo* repression of *yrbE* and *vacJ* as well as plasmid maintenance of p and pyrBF-B in absence of antibiotic selection. Related to Figure 1.**

(A) Relative expression levels of *yrbE* and *vacJ* were determined by quantitative real time PCR *in vitro* (n = 6) during growth in LB broth (open circles) and *in vivo* (n = 10 for *yrbE* and n = 9 for *vacJ*) during intestinal colonization (22 h post-infection, grey circles).

(B) Plasmid maintenance of the empty pMMB67EH vector (p, Ap<sup>R</sup>) and the *yrb* operon expression vector (pyrBF-B, Ap<sup>R</sup>) in *V. cholerae* is indicated as the ratio of CFU (Ap<sup>R</sup>) / CFU (Sm<sup>R</sup>) after 22 h growth in LB broth (open circles) and *in vitro* during intestinal colonization (22 h post-infection, grey circles). A ratio of 1 (dashed line) indicates optimal plasmid stability. Horizontal bars indicate the median of each data set (n = 6).

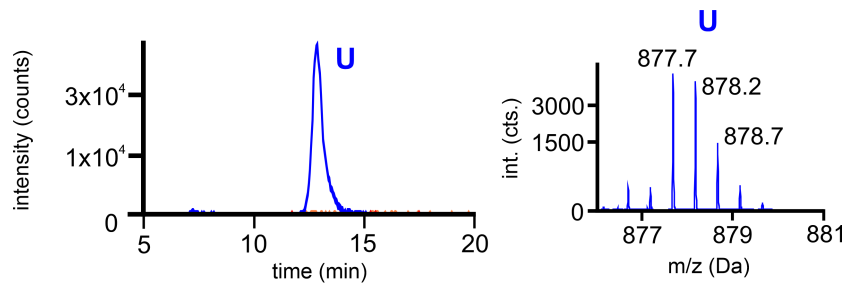

**Figure S2. Mass spectrometry analysis of lipid A extracted from the  $\Delta almG$  mutant. Related to Figure 3.**

Lipid A extracted after the M9 to M9<sup>ToxR $\uparrow$ /Alm $\uparrow$</sup>  transition from  $\Delta almG$  after 8 h was analyzed. Comparable to figure 3 the left graph shows the extracted ion chromatogram of m/z 877.7 (U, representing unmodified lipid A) in blue, m/z 906.2 (M1, representing mono-glycinated lipid A) in orange, and m/z 934.7 (M2, representing di-glycinated lipid A) in red. Only the unmodified lipid A species at m/z 877.7 could be detected, the mono- and di-glycinated lipid A species were below limit of detection. In addition, the high-resolution mass spectrum of the unmodified doubly charged lipid A species with its isotope pattern is displayed in the right graph.

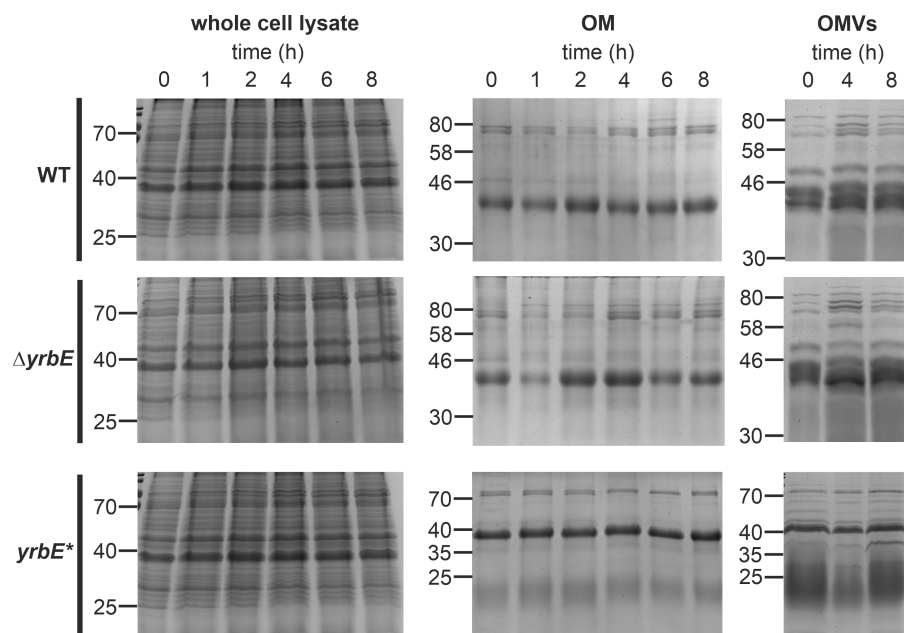

**Figure S3. Coomassie-stained gels of whole cell lysates, OM preparations and isolated OMVs derived from WT,  $\Delta yrbE$  and  $yrbE^*$ . Related to Figure 4.**

Shown are Coomassie-stained gels loaded with cell equivalents of whole cell lysates or protein equivalents (5  $\mu$ g) of OM preparations and OMVs from WT,  $\Delta yrbE$  and  $yrbE^*$ . Samples were taken at time points 0, 1, 2, 4, 6 and 8 h for whole cell lysates and OM as well as 0, 4 and 8 h for OMVs after transition from M9 to M9<sup>ToxR $\uparrow$</sup> . Molecular mass standards are indicated on the left using either Prestained Protein Marker Broad Range (New England Biolab) or PageRuler<sup>TM</sup> Prestained Protein Ladder 10 - 180 kDa (Thermo Fisher).

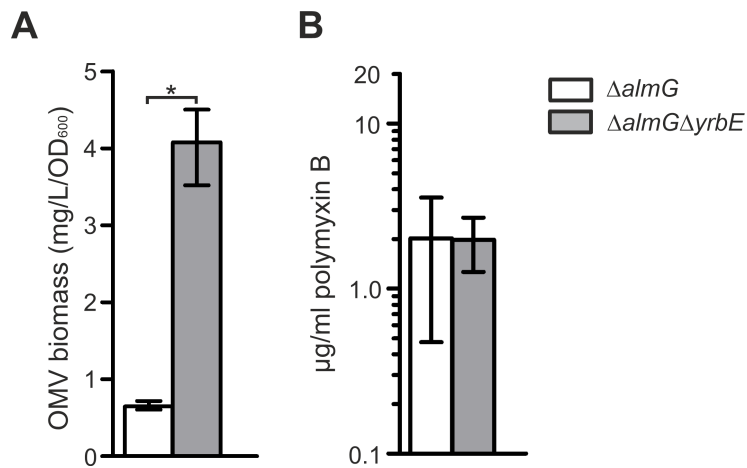

**Figure S4. OMV production and minimal inhibitory concentrations (MIC) of polymyxin B (PMB) determined for  $\Delta almG$  and  $\Delta almG\Delta yrbE$ . Related to Figure 5.**

(A) Quantification of OMV biomass (Bradford) prepared from equivalent OD<sub>600</sub> units of  $\Delta almG$  and  $\Delta almG\Delta yrbE$  after 8 h cultivation in minimal media M9<sup>ToxR $\uparrow$</sup> . Data is presented as the median with interquartile range (n = 6; \* $P < 0.05$ ).

(B) Shown are minimal inhibitory concentrations (MIC) of polymyxin B (PMB) for the  $\Delta almG$  (n = 12) and  $\Delta almG\Delta yrbE$  mutants (n = 15) along a transition from M9 to M9<sup>ToxR $\uparrow$ /Alm $\uparrow$</sup>  [(di)glycine-modified lipid A activating conditions using sub-MIC PMB concentrations (0.3 μg/ml)]. Bacteria were allowed to adapt for 2 h after transition into the fresh medium before additional PMB was added in diverse concentrations to determine the MIC. Results are presented as mean  $\pm$  SD (\* $P < 0.05$ ).

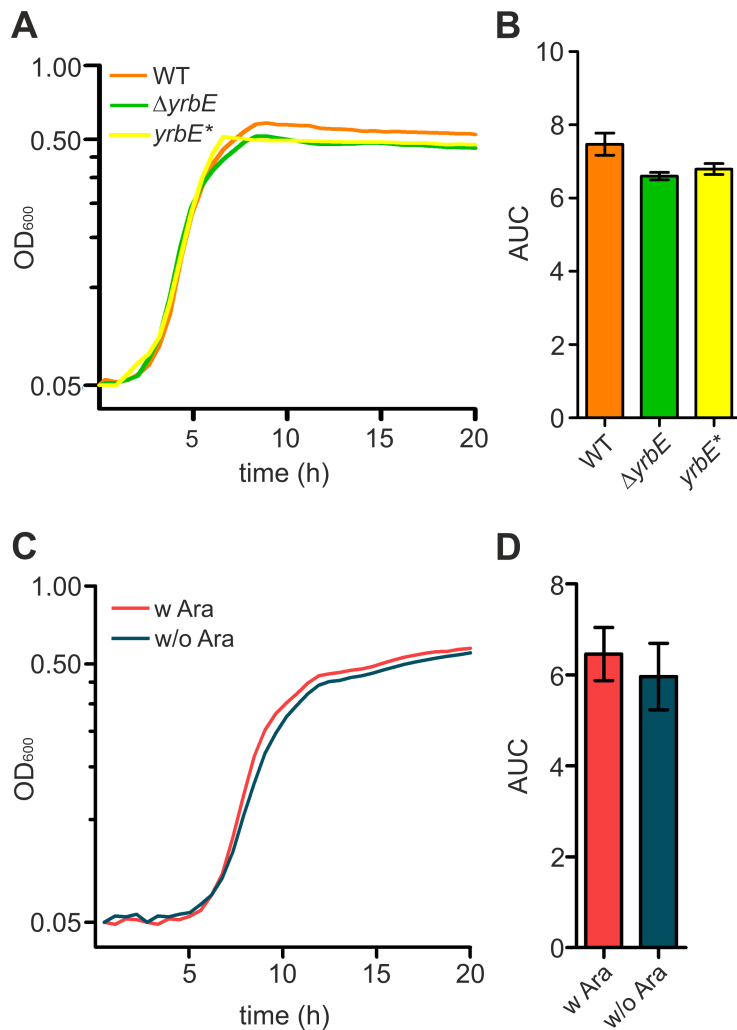

**Figure S5. Hyper- or hypo-vesiculation by deletion of *yrbE* or overexpression of *yrbF-B* does not affect growth in minimal media  $M9^{ToxR^\uparrow}$ . Related to Figure 5.**

Shown are growth curves (A, C) and the retrieved area under curve (AUC) values (B, D) for the *V. cholerae* WT,  $\Delta yrbE$  and the complementation strain  $yrbE^*$  (A, B) shifted from M9 to  $M9^{ToxR^\uparrow}$  or the arabinose-inducible strain  $yrbF-B^{pARA}$  shifted from M9 to  $M9^{ToxR^\uparrow}$  with (w) or without (w/o) arabinose (Ara) (C, D). Data is presented as mean values  $\pm$  SD with the following number of biological replicates:  $n = 4$  for WT and  $\Delta yrbE$  as well as  $n = 8$  for  $yrbE^*$ ,  $yrbF-B^{pARA}$  w Ara and  $yrbF-B^{pARA}$  w/o Ara, respectively.

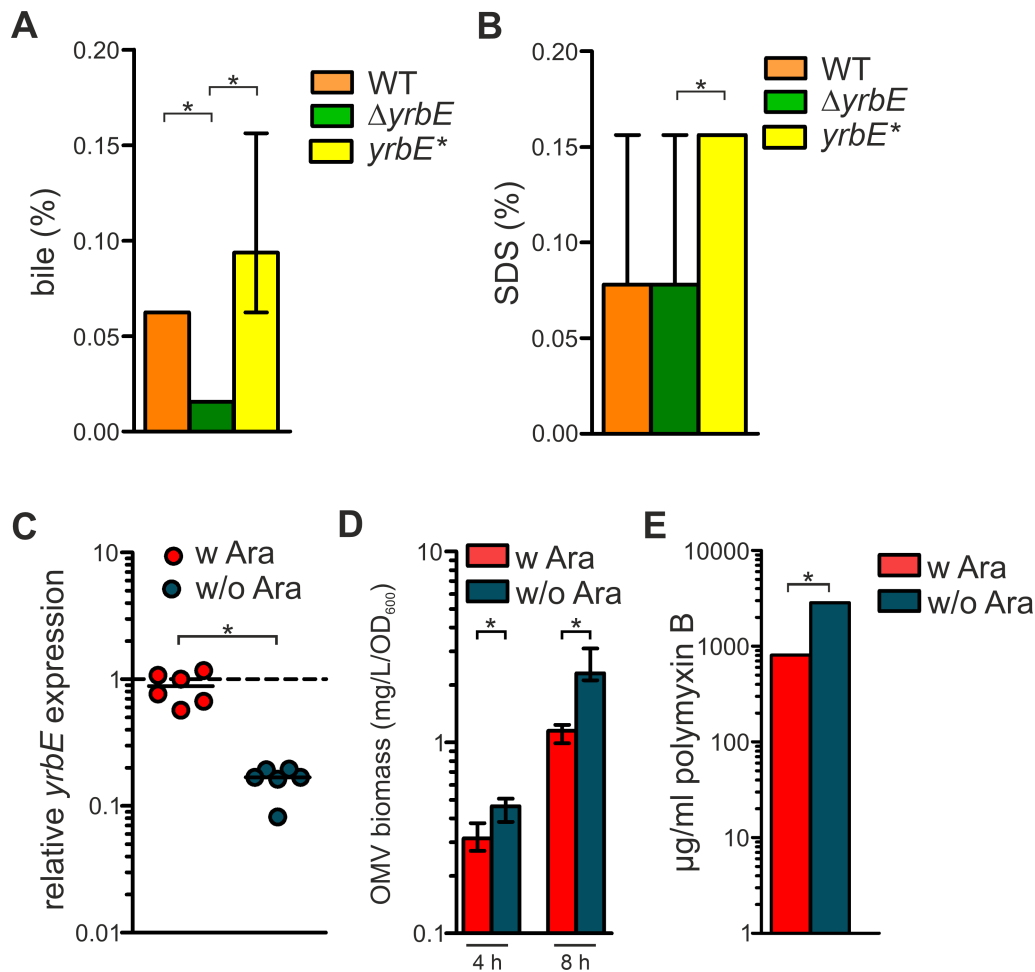

**Figure S6. Minimal inhibitory concentrations (MIC) of antimicrobial substances and OMV production for various *V. cholerae* strains used in this study. Related to Figure 5.**

(A and B) Shown are minimal inhibitory concentrations (MIC) of bile (A) and SDS (B) for WT,  $\Delta yrbE$  and the complementation strain  $yrbE^*$  grown in M9. Data is presented as the median with interquartile range ( $*P < 0.05$ ) with the following number of biological replicates: MIC of bile for WT ( $n = 22$ ), for  $\Delta yrbE$  ( $n = 8$ ) and for  $yrbE^*$  ( $n = 18$ ) as well as  $n = 12$  for the MIC of SDS for all strains tested.

(C) Relative expression levels of  $yrbE$  in the arabinose-inducible  $yrbF$ - $B$  variant were determined by quantitative real time PCR *in vitro* during growth in M9<sup>ToxR $\uparrow$</sup>  with (w) or without (w/o) arabinose (Ara) ( $n = 6$ ;  $*P < 0.05$ ).

(D) Quantification of OMV biomass (Bradford) prepared from equivalent OD<sub>600</sub> units of the arabinose-inducible  $yrbF$ - $B$  variant. Values were obtained after 4 and 8 h cultivation in minimal

media M9<sup>ToxR<sup>↑</sup></sup> with (w) or without (w/o) arabinose (Ara). Data is presented as the median with interquartile range (n = 6; \**P* < 0.05).

(E) Shown are the minimal inhibitory concentrations (MIC) of the arabinose-inducible strain *yrbF-B<sup>pARA</sup>* against polymyxin B (PMB) along a transition from M9 to M9<sup>ToxR<sup>↑</sup>/Alm<sup>↑</sup></sup> [(di)glycine-modified lipid A activating conditions using sub-MIC PMB concentrations (3 µg/ml)] with (w) or without (w/o) arabinose (Ara). Bacteria were allowed to adapt for 2 h after transition into the fresh medium before additional PMB was added in diverse concentrations to determine the MIC. Results are presented as mean ± SD (n = 6; \**P* < 0.05).

**Table S1. List of oligonucleotides used in this study, related to STAR Methods**

| Oligonucleotides                                      | Source               |
|-------------------------------------------------------|----------------------|
| almG_XbaI_1<br>AATTCTAGAGGCAAACAGTTAGTGAAGGG          | This paper           |
| almG_BamHI_2<br>TATGGATCCTTTTTTCCGACTTATCGGCTTA       | This paper           |
| almG_BamHI_3<br>AAAGGATCCAAGCAATTCGGTGTATCTAAGA       | This paper           |
| almG_SacI_4<br>AATGAGCTCTCCACAATAAGTTGTGCCAAAG        | This paper           |
| lacZ_XbaI_1<br>TATCTAGAATGTACGCCGTAGAGCAAAG           | This paper           |
| lacZ_BamHI_2<br>TAGGATCCATGGCGAGTCACTTGGCTAA          | This paper           |
| lacZ_SphI_3<br>ATGCATGCGTGTGGAATGTGACGAT              | This paper           |
| lacZ_SacI_4<br>ATGAGCTCTTATTGTGGGGATGACCTTTAAAG       | This paper           |
| araC_BamHI_1<br>AAAGGATCCAGACACTTTTGTACGCGTTTT        | This paper           |
| araC_SphI_2<br>ATTGCATGCTTATGACAACTGACGGCTAC          | This paper           |
| yrb_SacI_1<br>AAAGAGCTCGCGATATTGGCAATGTTTGAAC         | This paper           |
| yrb_SphI_2<br>AAAGCATGCGATAAGGATAATTAATTGGAATC        | This paper           |
| yrb_EcoRI_3<br>AAAGAATTCTCAGGATGTCGACCTAACAG          | This paper           |
| yrb_XbaI_4<br>TTTTCTAGAGATTAAGGTTACGGATCAGTTC         | This paper           |
| para_SphI_1<br>AAAGCATGCAAAGCCATGACAAAAACGCG          | This paper           |
| para_EcoRI_2<br>GAATTCGCTAGCCCCAAAAAAC                | This paper           |
| almG_pGPphoA_SacI<br>TTGAGCTCGTTAACCTCAGGTTTATTTTATTT | This paper           |
| almG_pGPphoA_KpnI<br>ATTGGTACCTTACTTAAAACGCCGATAAAGC  | This paper           |
| yrb_operon_SacI_1<br>TTTGAGCTCTTTCAGGATGTCGACCTAA     | This paper           |
| yrb_operon_XbaI_2<br>AAATCTAGACTATCCACAATTCACCTCTGC   | This paper           |
| VC2519_XbaI_up_fw<br>AAATCTAGACTTAGTCAACCATCAAAAATT   | (Roier et al., 2016) |
| VC2519_XmaI_down_rv<br>AAACCCGGGCTCCGCCACATCTTCACGTT  | This paper           |
| comp_yrbE*_1<br>GTTGCATGTTAATTCCTAAACATCAATGCGG       | This paper           |
| comp_yrbE*_2<br>TTTGGAATTAACATGCAACAAACACGAAAAATTG    | This paper           |
